# Supplementary material for: Stabilization of copper iodide hybrids with increased strength of ionic bonding for lighting and X-ray imaging
Source: Royal Society of Chemistry journal article supplement (doi:10.1039/d4qi02068e), 2024-01-01
Supplement: d4qi02068e1.pdf [file d4qi02068e1.pdf]

## Supporting Information

# Stabilization of Copper Iodide Hybrids with Increased Strength of Ionic Bonding for Lighting and X-ray Imaging

Qianqian Wang, Haibo Li,\* Jiali Fan, Zhennan Zhou, Hua Tong, Jialin Zhu, Wei Liu\* and Gangfeng Ouyang\*

School of Chemical Engineering and Technology, Sun Yat-sen University & Southern Marine Science and Engineering Guangdong Laboratory (Zhuhai), Zhuhai, 519082, Guangdong, P. R. China

E-mail: lih63@mail.sysu.edu.cn, liuwei96@mail.sysu.edu.cn, cesoygf@mail.sysu.edu.cn

### EXPERIMENTAL SECTION

**Materials.** CuI (>99.5%, Aladdin), triethylenediamine (ted, 98%, Macklin), 1-bromopropane (>99.0%, Macklin), 1-bromobutane (>99.0%, Macklin), 1-bromopentane (>99.0%, Macklin), potassium iodide (99.21%, Bidepharm), methanol (99.5%, Macklin), dimethyl sulfoxide-d<sub>6</sub> (DMSO-d<sub>6</sub>, D.99.9% +0.03% TMS, Macklin), acetonitrile (AR, Macklin), polydimethylsiloxane (PDMS, AR, Macklin) and deionized water. All reagents were used as received without further purification.

**Preparation of R-ted-R ligands.** 10 mmol triethylenediamine (ted, 1.12 g) was dissolved in 5 mL of acetonitrile. Under magnetic stirring, 5 mL acetonitrile solution dissolved with 40 mmol of bromoalkane was dropwise added into the ted acetonitrile solution and stirred for 2 days to obtain the white precipitate. And the reaction solution is then poured out, leaving only the powder product, which is washed with cyclohexane and finally dried under vacuum. All ligands were dissolved in methanol at the concentration of 3 mL methanol/1 mmol ligand and prepared into methanol solution for use.

**Synthesis of crystals of compounds 1-3.** Single crystals were prepared by a slow diffusion method. In a glass sample bottle, 1 mmol CuI (0.19 g) was dissolved in 5 mL saturated KI solution, and then

2 mL acetonitrile was dropwise added. Finally, 3 mL methanol solution containing the ligand was slowly dribbled into the solution (the ligand dosage was 1 mmol). After a few days, transparent crystals grow out in the bottle, and the crystals emit bright yellow light under the ultraviolet lamp. Scoop out the crystals, and then add a small amount of ethanol to carefully rinse the crystals, and finally dry the crystals under vacuum.

**Synthesis of powder of compounds 1-3.** The 1 mmol R-*ted*-R ligand was dissolved in 3 mL methanol solution, and then 5 mL saturated KI solution dissolved with 1 mmol CuI was dropped into the solution to immediately produce a large amount of powder, which was illuminated with bright yellow light by 365 nm UV lamp. Then the product was centrifuged and washed with deionized water three times to remove KI in the solution, and then washed with anhydrous ethanol again and dried in vacuum. Finally, the powder was collected and weighed, and the product masses of compounds **1**, **2** and **3** were 168.4 mg, 545 mg and 284 mg, respectively.

**LC-MS and <sup>1</sup>H-NMR analyses.** Liquid chromatography-mass spectrometry (LC-MS, Thermo Fisher, UltiMate3000 ISQESI) and 600 M nuclear magnetic resonance hydrogen spectrum (<sup>1</sup>H-NMR, Bruker Switzerland AG, AVANCE NEO 600) to verify the successful synthesis of the R-*ted* organic ligand and test the purity of the product. Mass spectrometry: All ligands were synthesized into 2 mg/mL methanol solution under direct injection and ESI+ detection mode, and the ion source was Electron Spray Ionization (ESI). <sup>1</sup>H-NMR spectroscopy: 5-10 mg ligand dissolved in 0.5 mL dimethyl sulfoxid-D<sub>6</sub> deuterium.

**Microscope images.** The crystal micrographs were obtained by using a MIT500 metallographic microscope. The glow micrographs were obtained in the dark under the illumination of a 365 nm ultraviolet LED.

**Single-crystal X-ray diffraction (SCXRD).** Single crystal data was collected on a Bruker D8 Venture METALJET Ga-Target SC-XRD under test temperature (*T*) of 100 K and radiation wavelength ( $\lambda$ ) of 0.71073 Å. The structure was solved by direct method and refined by full-matrix least-squares on  $F^2$  using the Bruker SHELXTL package. The data can be obtained free of charge from The Cambridge Crystallographic Data Centre (CCDC) via [www.ccdc.cam.ac.uk/data\\_request/cif](http://www.ccdc.cam.ac.uk/data_request/cif). The structures of compounds **1-3** are deposited in CCDC with deposition number of 2368508, 2368509 and 23685010, respectively.

**Powder X-ray diffraction (PXRD).** PXRD data were collected on the Rigaku Ultima IV automated

diffraction system with an X-ray source of 1.54056 Å Cu K $\alpha$ 1 and a power of 40 kV/40 mA (5-50°, 10°/min).

**X-ray photoelectron spectroscopy (XPS) tests.** The XPS spectra of compounds **1-3** were obtained by an X-ray photoelectron spectrometer (SHIMADZU AXIS SUPRA+).

**Optical diffuse reflectance measurements.** Optical diffuse reflectance spectrum was measured on the UV-2600 spectrophotometer from Shimadzu using BaSO<sub>4</sub> powder as the reflectivity reference. The optical bandgap was calculated by use of a typical Tauc method by employing the equation:  $(\alpha h\nu)^n = A(h\nu - E_g)$ , where  $\alpha$ ,  $h$ ,  $\nu$ ,  $A$ , and  $E_g$  are the absorption coefficient, Planck's constant, light frequency, a constant, and band gap. The value of  $n$  here is 2 presuming that compounds **1-3** are direct transition semiconductors.

**Thermogravimetric (TG) analysis.** The TG analysis was performed on the TG analyzer (Netzsch TG 209 F1 Libra R) and was heated from room temperature to 800 °C under nitrogen flow at a rate of 10 °C/min.

**Photoluminescence/radioluminescence related measurements.** Photoluminescence emission (PL) and excitation (PLE) measurements, radioluminescence (RL), room temperature fluorescence decay curve and photoluminescence quantum yield (PLQY) tests were carried out on FLS1000 spectrofluorometer (Edinburgh Instruments). The fluorescent lifetime excitation source is Edinburgh EPLED-295/365 nm picosecond pulsed diode laser. An X-ray tube (Moxtek, TUB00154-9I-WO6, working condition: 50 kV, 20  $\mu$ A) was used to collect the RL spectra, and BGO (Bi<sub>4</sub>Ge<sub>3</sub>O<sub>12</sub> crystal, a known reference material) was used for comparison.

**Fabrication of flexible scintillator screens.** 0.50 g compound **3** and 1.00 g PDMS were mixed uniformly and then dropped on the glass substrate, and then a thin film with uniform thickness was prepared by spin coating. The spin-coated films can be peeled off the glass substrate after curing at 120 °C overnight.

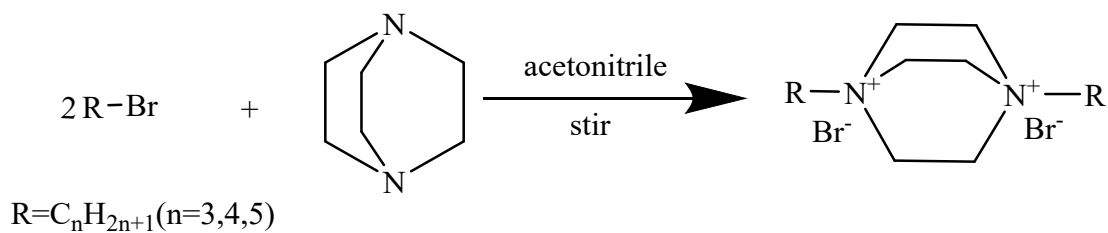

Figure S1. Synthesis of disubstituted ted derivative ligands.

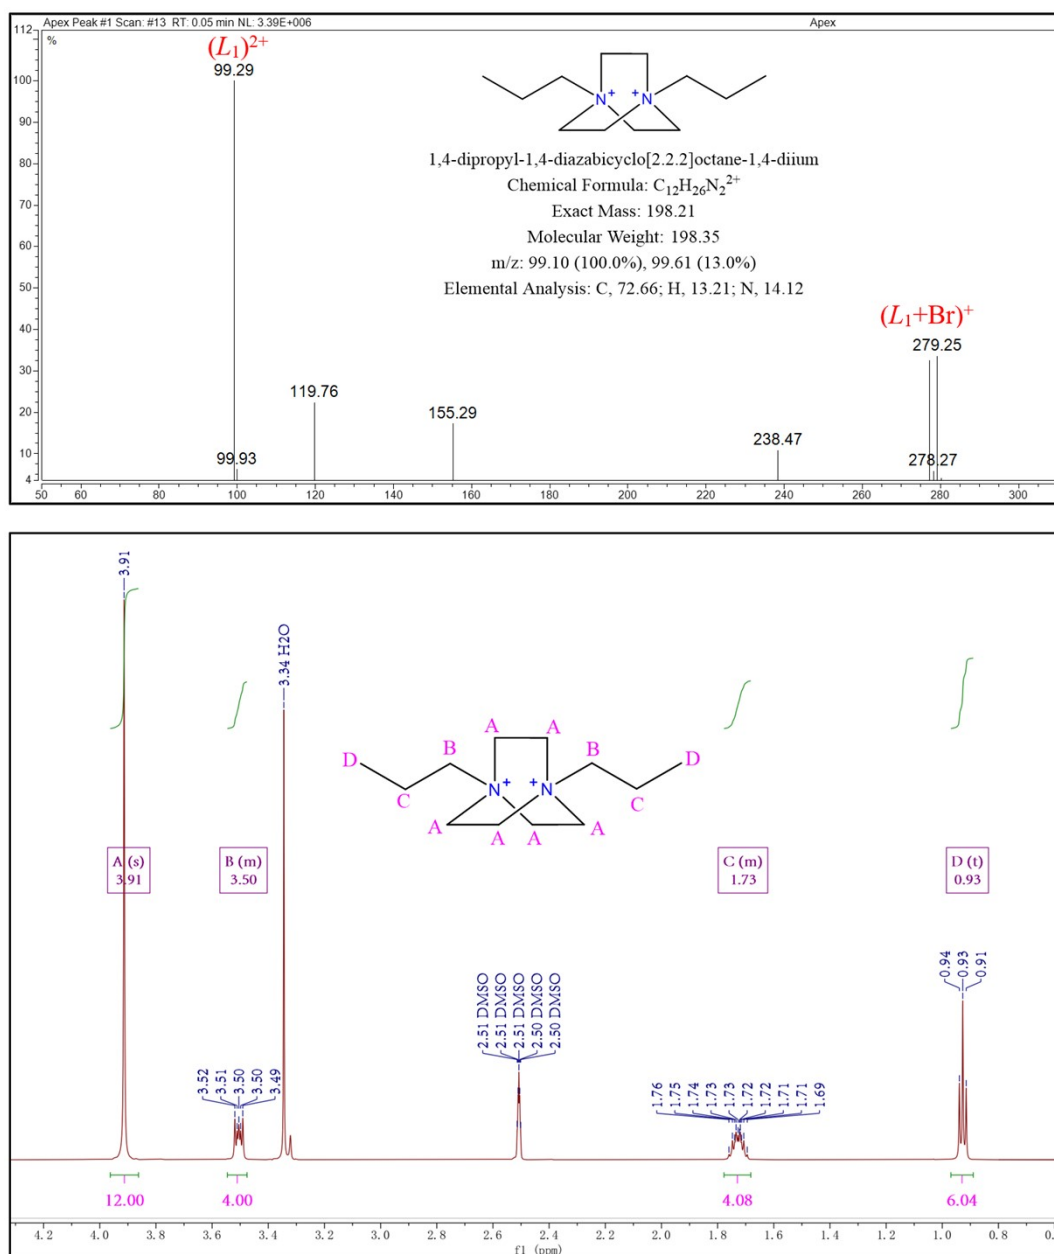

Figure S2. MS (top) and  $^1H$ -NMR (bottom) spectra of R-ted-R organic ligand  $L_1$ . The inset is for its molecular structure.  $^1H$  NMR (600 MHz,  $DMSO-d_6$ )  $\delta$  3.91 (s, 12H), 3.55 – 3.48 (m, 4H), 1.78 – 1.68 (m, 4H), 0.93 (t,  $J = 7.3$  Hz, 6H).

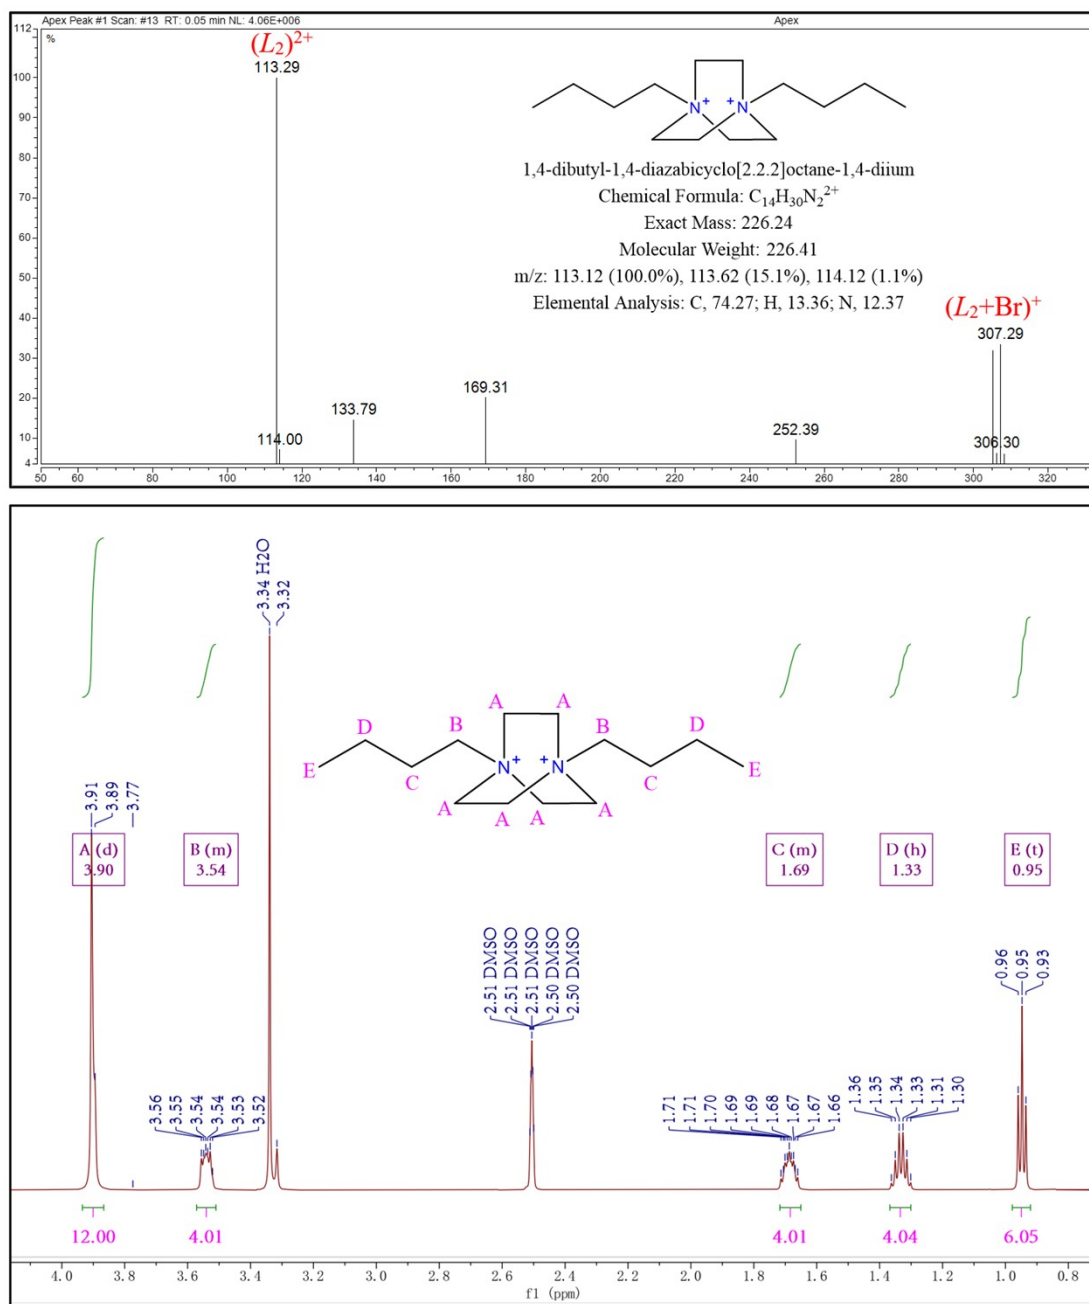

Figure S3. MS (top) and  $^1\text{H}$ -NMR (bottom) spectra of R-*ted*-R organic ligand  $L_2$ . The inset is for its molecular structure.  $^1\text{H}$  NMR (600 MHz,  $\text{DMSO}-d_6$ )  $\delta$  3.90 (d,  $J = 6.8$  Hz, 12H), 3.57 – 3.51 (m, 4H), 1.73 – 1.65 (m, 4H), 1.33 (h,  $J = 7.4$  Hz, 4H), 0.95 (t,  $J = 7.4$  Hz, 6H).

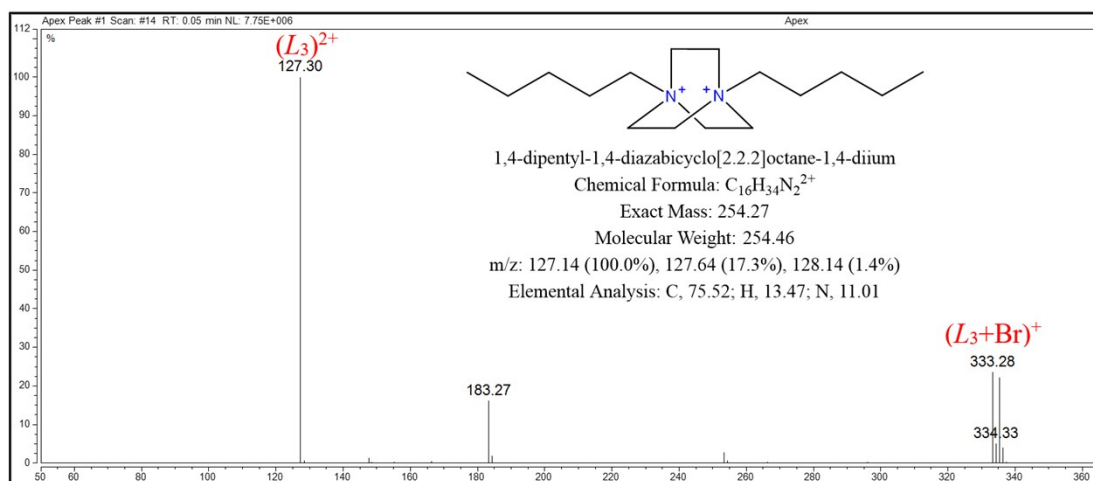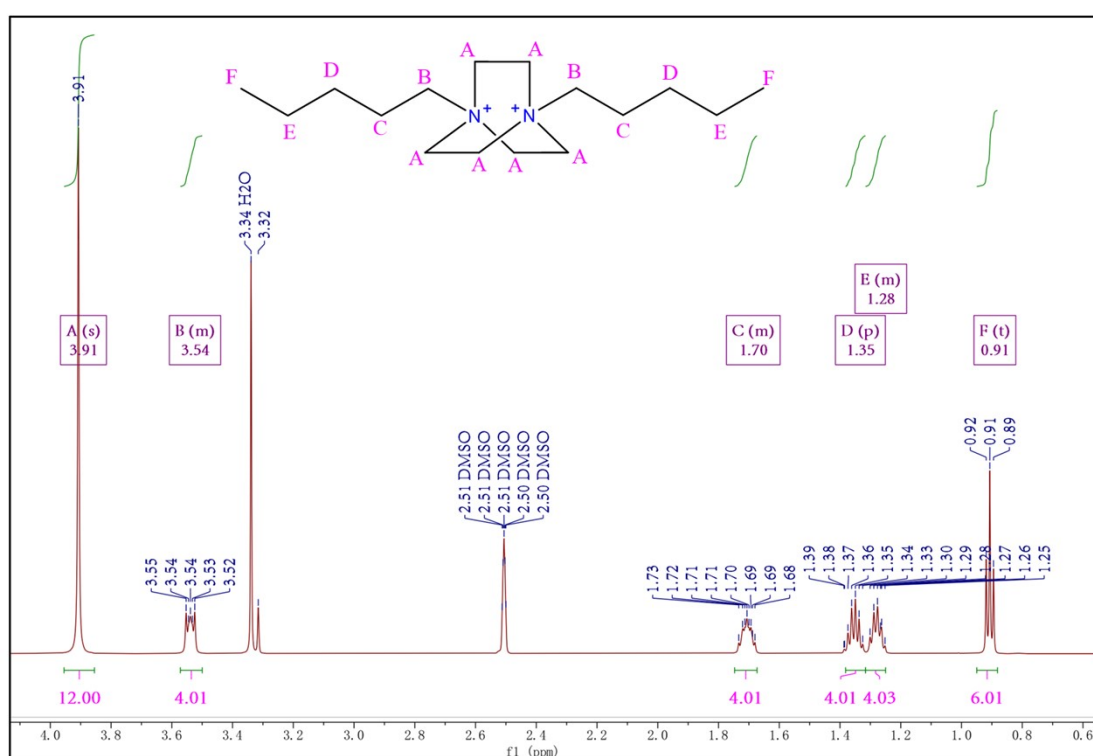

Figure S4. MS (top) and  $^1\text{H}$ -NMR (bottom) spectra of R-ted-R organic ligand  $L_3$ . The inset is for its molecular structure.  $^1\text{H}$  NMR (600 MHz,  $\text{DMSO-}d_6$ )  $\delta$  3.91 (s, 12H), 3.57 – 3.50 (m, 4H), 1.75 – 1.67 (m, 4H), 1.35 (p,  $J = 7.2$  Hz, 4H), 1.32 – 1.25 (m, 4H), 0.91 (t,  $J = 7.2$  Hz, 6H).

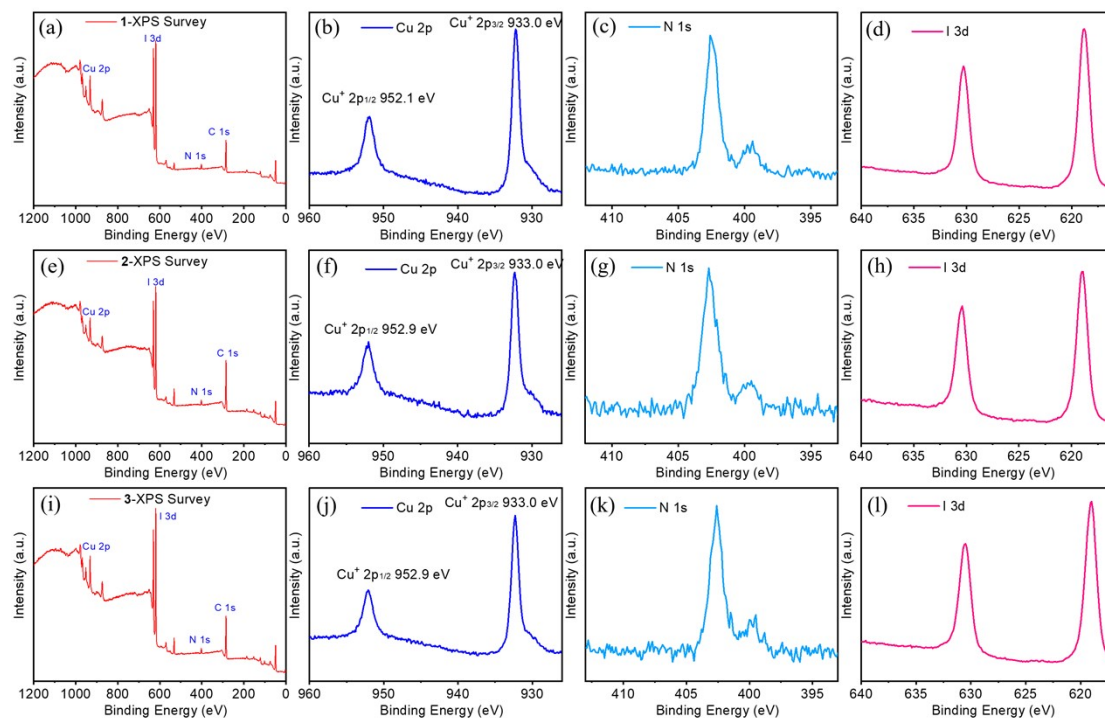

Figure S5. X-ray photoelectron spectroscopy (XPS) survey spectra and high-resolution XPS spectra of Cu 2p, N 1s and I 3d of compounds (a-d) **1**, (e-h) **2** and (i-l) **3**, respectively.

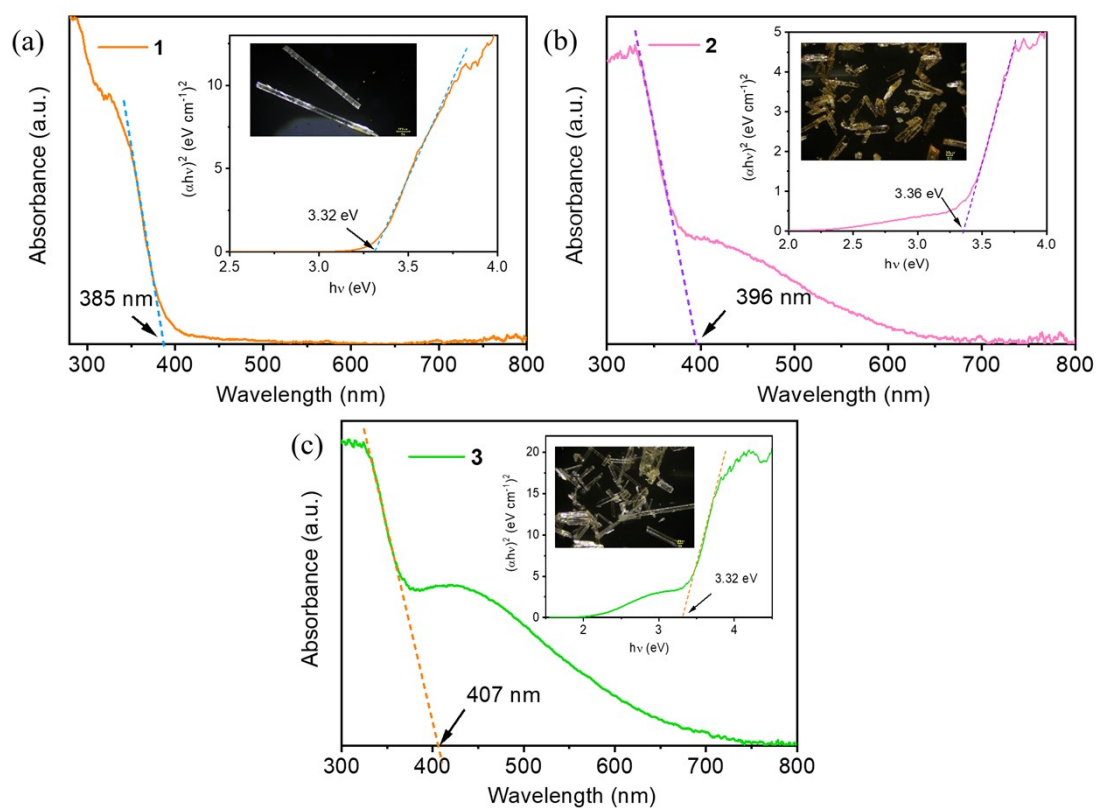

Figure S6. (a-c) UV-Vis diffuse reflectance spectra of compounds **1-3** (insets are Tauc curves and microscope images of crystals under natural light), respectively.

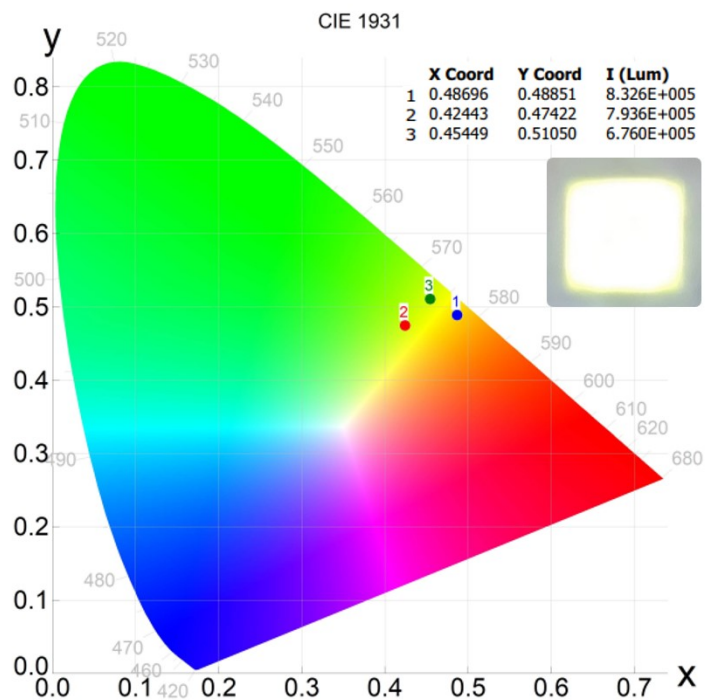

Figure S7. CIE color coordinates of compounds **1-3**. Inset: luminescent coating made by **3**.

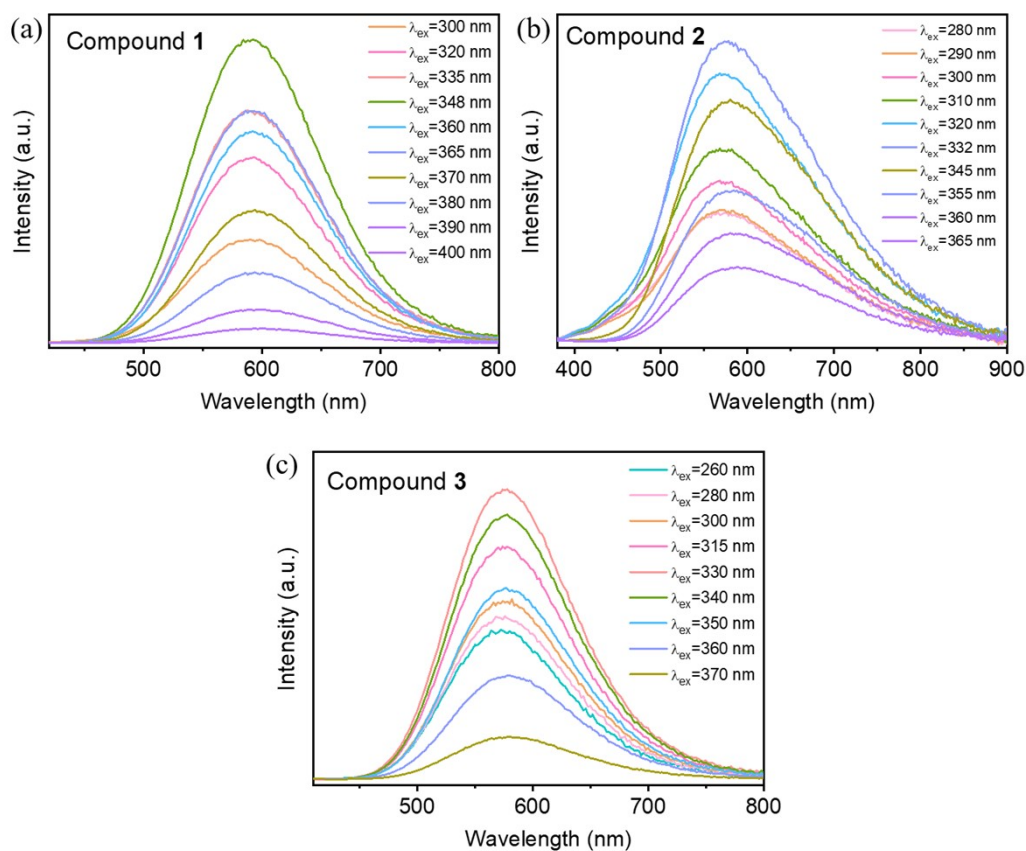

Figure S8. Emission spectra of compounds **1-3** under light excitation of different energies.



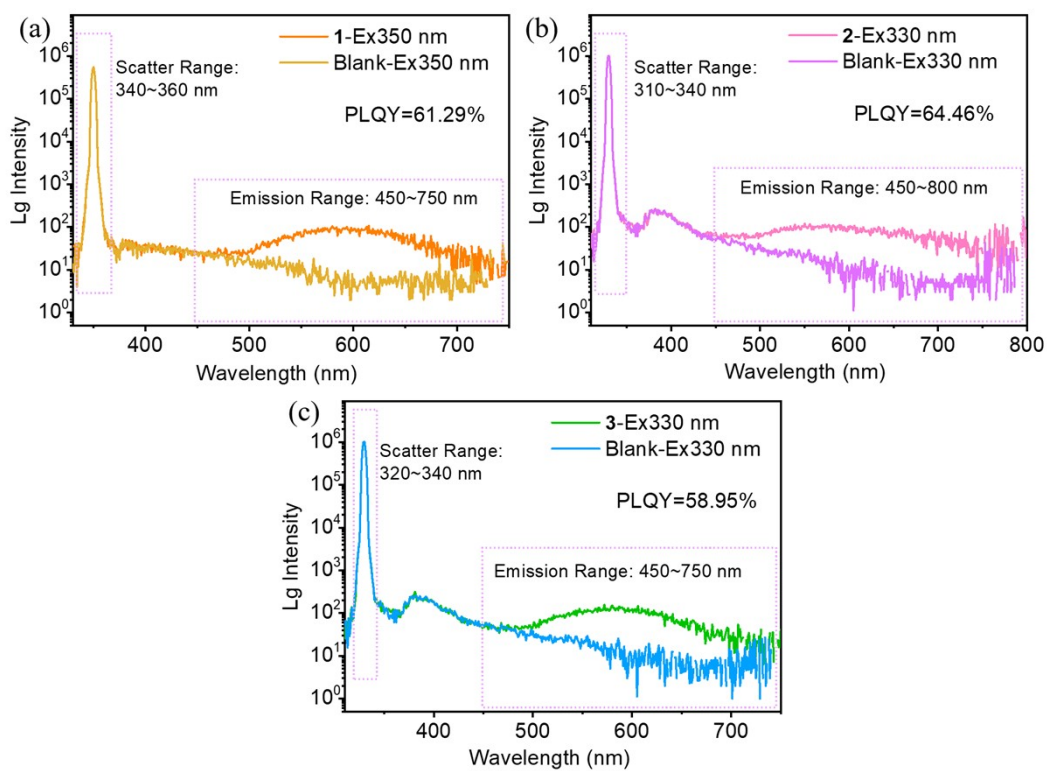

Figure S9. Photoluminescent quantum yield analysis curves of compounds 1-3.

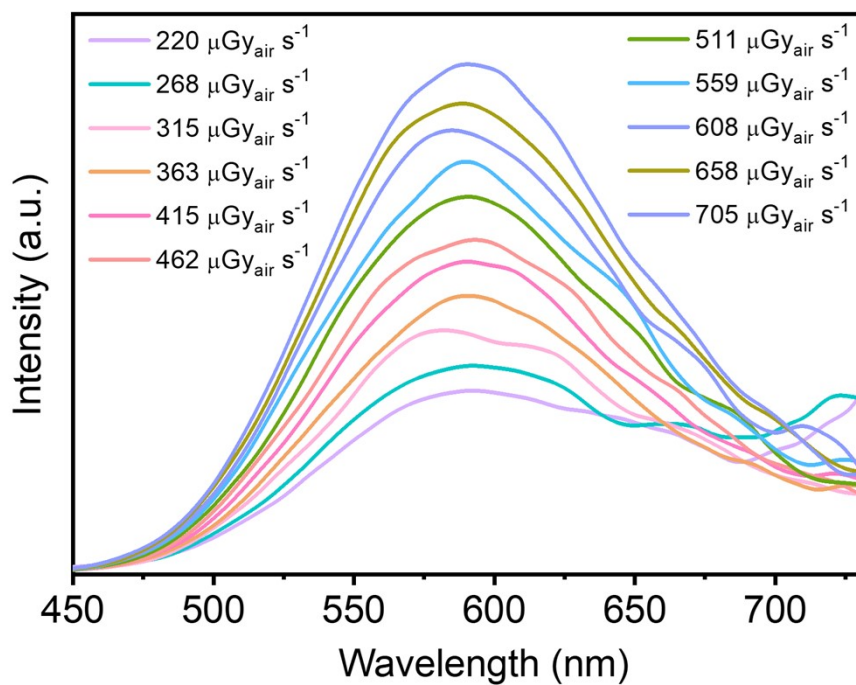

Figure S10. Radioluminescence (RL) spectra of compound 3 in the dose rate range of 220 to 705  $\mu\text{Gy}_{\text{air}} \text{s}^{-1}$ .

Table S1. Preparation information of three R-ted-R organic ligands.

| Ligand number  | Systematic name                                             | Abbreviation | Corresponding bromoalkane and its dosage | Yield |
|----------------|-------------------------------------------------------------|--------------|------------------------------------------|-------|
| L <sub>1</sub> | 1,4-dipropyl-1,4-diazabicyclo [2.2.2]octan-1,4-dium bromide | Pr-ted-Pr    | 1-bromopropane, 4.92 g                   | 63%   |
| L <sub>2</sub> | 1,4-dibutyl-1,4-diazabicyclo [2.2.2]octan-1,4-dium bromide  | Bu-ted-Bu    | 1-bromobutane, 5.48 g                    | 55%   |
| L <sub>3</sub> | 1,4-dipentyl-1,4-diazabicyclo [2.2.2]octan-1,4-dium bromide | Pen-ted-Pen  | 1-bromopentane, 6.04 g                   | 49%   |

Table S2. Summary of single crystal analysis data of compounds **1-3**.

| Hybrid                     | Compound <b>1</b><br>(Cu <sub>4</sub> I <sub>8</sub> )(CuI <sub>4</sub> ) <sub>3</sub> (C <sub>12</sub> H <sub>26</sub> N <sub>2</sub> ) <sub>6</sub> <sup>[a]</sup> | Compound <b>2</b><br>(Cu <sub>3</sub> I <sub>6</sub> )(C <sub>14</sub> H <sub>30</sub> N <sub>2</sub> ) <sup>[b]</sup> | Compound <b>3</b><br>(Cu <sub>3</sub> I <sub>6</sub> ) <sub>4</sub> (C <sub>16</sub> H <sub>34</sub> N <sub>2</sub> ) <sub>6</sub> |
|----------------------------|----------------------------------------------------------------------------------------------------------------------------------------------------------------------|------------------------------------------------------------------------------------------------------------------------|------------------------------------------------------------------------------------------------------------------------------------|
| Ligand abbreviation        | Pr-ted-Pr                                                                                                                                                            | Bu-ted-Bu                                                                                                              | Pen-ted-Pen                                                                                                                        |
| Empirical formula          | C <sub>72</sub> H <sub>159</sub> Cu <sub>7</sub> I <sub>20</sub> N <sub>12</sub> O                                                                                   | C <sub>17</sub> H <sub>42</sub> Cu <sub>3</sub> I <sub>6</sub> N <sub>2</sub> KO <sub>3</sub>                          | C <sub>48</sub> H <sub>102</sub> Cu <sub>6</sub> I <sub>12</sub> N <sub>6</sub>                                                    |
| Formula weight             | 4191.96                                                                                                                                                              | 1314.91                                                                                                                | 2667.07                                                                                                                            |
| Space group                | <i>P</i> $\bar{1}$                                                                                                                                                   | <i>P</i> 2 <sub>1</sub> 2 <sub>1</sub> 2                                                                               | <i>Cc</i>                                                                                                                          |
| <i>a</i> (Å)               | 8.1488(5)                                                                                                                                                            | 13.2569(3)                                                                                                             | 16.9436(2)                                                                                                                         |
| <i>b</i> (Å)               | 28.0082(18)                                                                                                                                                          | 31.2788(9)                                                                                                             | 28.3740(3)                                                                                                                         |
| <i>c</i> (Å)               | 30.0270(19)                                                                                                                                                          | 8.5120(2)                                                                                                              | 32.0723(3)                                                                                                                         |
| $\alpha$ (deg)             | 62.316(2)                                                                                                                                                            | 90                                                                                                                     | 90                                                                                                                                 |
| $\beta$ (deg)              | 83.563(2)                                                                                                                                                            | 90                                                                                                                     | 102.407(1)                                                                                                                         |
| $\gamma$ (deg)             | 83.272(2)                                                                                                                                                            | 90                                                                                                                     | 90                                                                                                                                 |
| <i>V</i> (Å <sup>3</sup> ) | 6013.9(7)                                                                                                                                                            | 3529.59(15)                                                                                                            | 15058.9(3)                                                                                                                         |
| <i>Z</i>                   | 2                                                                                                                                                                    | 4                                                                                                                      | 4                                                                                                                                  |
| Test temperature(K)        | 100                                                                                                                                                                  | 100                                                                                                                    | 100                                                                                                                                |
| $\lambda$ (Å)              | 0.71073                                                                                                                                                              | 0.71073                                                                                                                | 0.71073                                                                                                                            |
| <i>R</i> <sub>1</sub>      | 0.0728                                                                                                                                                               | 0.0294                                                                                                                 | 0.0485                                                                                                                             |
| <i>wR</i> <sub>2</sub>     | 0.2237                                                                                                                                                               | 0.0697                                                                                                                 | 0.1088                                                                                                                             |

<sup>[a]</sup> One H<sub>3</sub>O<sup>+</sup> in compound **1**, <sup>[b]</sup> one K<sup>+</sup> and three CH<sub>3</sub>OH in compound **2** are omitted for consistency of the structural formula.

Table S3. Comparison of some optical properties of compounds **1-3**.

| Compound | Band gap (eV) | PLE <sub>max</sub> (nm) | PL <sub>max</sub> (nm) | Stokes shift (nm) | fwhm (nm) | PLQY (%) |
|----------|---------------|-------------------------|------------------------|-------------------|-----------|----------|
| <b>1</b> | 3.32          | 348                     | 592                    | 244               | 132       | 61.29    |
| <b>2</b> | 3.36          | 332                     | 578                    | 246               | 180       | 64.46    |
| <b>3</b> | 3.32          | 330                     | 578                    | 248               | 130       | 58.95    |

Table S4. The WLED performance of compound **3** [(Cu<sub>3</sub>I<sub>6</sub>)<sub>4</sub>(C<sub>16</sub>H<sub>34</sub>N<sub>2</sub>)<sub>6</sub>] compared with other similar materials.

| Number | Compound                                                                                                                                      | CRI   | CIE coordinates | CCT (K) | Reference |
|--------|-----------------------------------------------------------------------------------------------------------------------------------------------|-------|-----------------|---------|-----------|
| 1      | BAM, (Cu <sub>3</sub> I <sub>6</sub> ) <sub>4</sub> (C <sub>16</sub> H <sub>34</sub> N <sub>2</sub> ) <sub>6</sub>                            | 85    | (0.33, 0.39)    | 5220    | This work |
| 2      | YAG: Ce, CuX <sub>2</sub> (tpp) <sub>2</sub> (i-bu- <i>ted</i> )                                                                              | /     | (0.329, 0.406)  | 5652    | [1]       |
| 3      | Cu <sub>2</sub> I <sub>2</sub> (tpp) <sub>2</sub> (bpp),<br>Cu <sub>2</sub> I <sub>2</sub> (tpp) <sub>2</sub> (4,4'-bpy)                      | 73.8  | (0.31, 0.36)    | 4512    | [2]       |
| 4      | 1D-CuBr(py) <sub>0.9995</sub> (pz) <sub>0.0005</sub>                                                                                          | 68.4  | (0.34, 0.41)    | 5792    | [3]       |
| 5      | 1D-CuBr(py) <sub>0.9993</sub> (pz) <sub>0.0007</sub>                                                                                          | 67.0  | (0.35, 0.42)    | 5024    | [3]       |
| 6      | 1D-CuBr(py) <sub>0.9988</sub> (pz) <sub>0.0012</sub>                                                                                          | 67.2  | (0.39, 0.43)    | 3888    | [3]       |
| 7      | 1D-CuBr(py) <sub>0.9968</sub> (pz) <sub>0.0032</sub>                                                                                          | 58.0  | (0.42, 0.46)    | 3658    | [3]       |
| 8      | 1D-CuBr(py) <sub>0.9988</sub> (2- <i>ct-pz</i> ) <sub>0.0012</sub>                                                                            | 65.4  | (0.26, 0.36)    | 4259    | [3]       |
| 9      | 1D-CuBr(py) <sub>0.9988</sub> (2- <i>me-pz</i> ) <sub>0.0012</sub>                                                                            | 65.5  | (0.28, 0.37)    | 3940    | [3]       |
| 10     | 1D-CuBr(py) <sub>0.9988</sub> (2- <i>Cl-pz</i> ) <sub>0.0012</sub>                                                                            | 77.2  | (0.43, 0.42)    | 3697    | [3]       |
| 11     | 1D-CuBr(py) <sub>0.9988</sub> (2- <i>Br-pz</i> ) <sub>0.0012</sub>                                                                            | 75.6  | (0.44, 0.40)    | 3360    | [3]       |
| 12     | (Sr, Ca)AlSiN <sub>3</sub> :Eu, (BPTA) <sub>2</sub> MnBr <sub>4</sub>                                                                         | 93.2  | (0.34, 0.39)    | 5301    | [4]       |
| 13     | BAM, [M <sub>2</sub> ImH] <sub>3</sub> <sup>+</sup> [SbCl <sub>6</sub> ] <sub>3</sub> <sup>-</sup>                                            | ~80.5 | (0.306, 0.323)  | ~7000   | [5]       |
| 14     | Cu <sub>2</sub> X <sub>3</sub> (tpp) <sub>2</sub> ( <i>n-pr-<i>ted</i></i> ),<br>Cu <sub>4</sub> I <sub>6</sub> ( <i>ted-oct-<i>ted</i></i> ) | 90    | (0.406, 0.422)  | 3800    | [6]       |

Table S5. The performance of compound **3** [(Cu<sub>3</sub>I<sub>6</sub>)<sub>4</sub>(C<sub>16</sub>H<sub>34</sub>N<sub>2</sub>)<sub>6</sub>] compared with other similar X-ray scintillators.

| Compound                                                                                                      | Light yield (photons/MeV) | Detection limit             | Reference |
|---------------------------------------------------------------------------------------------------------------|---------------------------|-----------------------------|-----------|
| (Cu <sub>3</sub> I <sub>6</sub> ) <sub>4</sub> (C <sub>16</sub> H <sub>34</sub> N <sub>2</sub> ) <sub>6</sub> | 17508                     | 1.14 μGy <sub>air</sub> /s  | This work |
| (4-bzpy) <sub>4</sub> Cu <sub>4</sub> I <sub>4</sub>                                                          | 60948                     | /                           | [7]       |
| (4-bzpy) <sub>2</sub> Cu <sub>6</sub> I <sub>8</sub>                                                          | 5353                      | /                           | [7]       |
| (4-bzpy) <sub>3</sub> Cu <sub>3</sub> I <sub>6</sub>                                                          | 7011                      | /                           | [7]       |
| Cu <sub>2</sub> Au <sub>2</sub> (R-BTT) <sub>4</sub>                                                          | 13600-17000               | 111.7 nGy <sub>air</sub> /s | [8]       |
| PPh <sub>4</sub> CuBr <sub>2</sub>                                                                            | 5000                      | 6.37 μGy <sub>air</sub> /s  | [9]       |
| (Bmpip) <sub>2</sub> Cu <sub>2</sub> Br <sub>4</sub>                                                          | 1600                      | 0.71 μGy <sub>air</sub> /s  | [9]       |
| Cu <sub>4</sub> I <sub>4</sub> py <sub>4</sub>                                                                | 9277±850                  | /                           | [10]      |
| CuCl(PPh <sub>3</sub> ) <sub>2</sub> (3-mepy)                                                                 | 5951±135                  | 338.8 nGy <sub>air</sub> /s | [11]      |

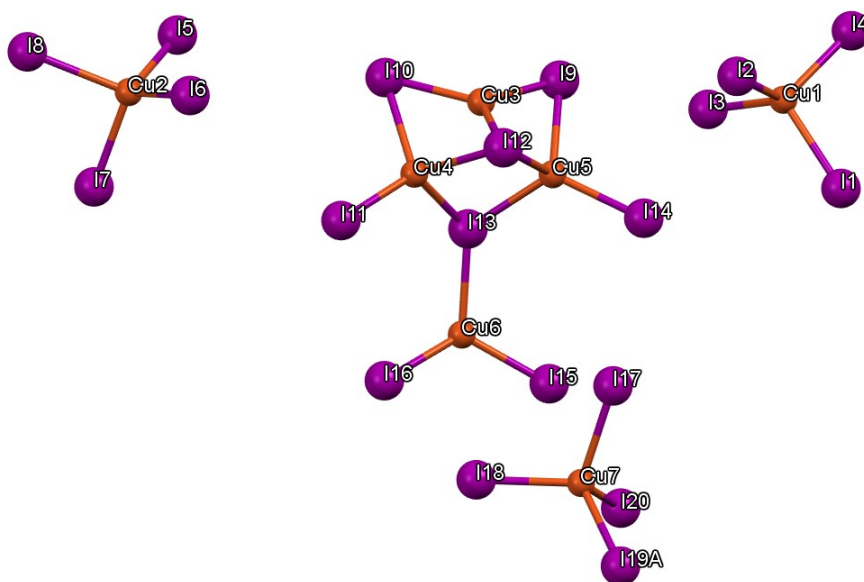

Figure S11. Schematic diagrams of inorganic module of compound **1**.

Table S6. Bond angles of inorganic module of compound **1**.

| Number | Atom1 | Atom2 | Atom3 | Angle(°)  |
|--------|-------|-------|-------|-----------|
| 1      | Cu3   | I9    | Cu5   | 58.01(9)  |
| 2      | Cu3   | I10   | Cu4   | 58.37(9)  |
| 3      | Cu3   | I12   | Cu4   | 56.56(9)  |
| 4      | Cu3   | I12   | Cu5   | 55.89(8)  |
| 5      | Cu3   | I12   | Cu6   | 164.01(9) |
| 6      | Cu4   | I12   | Cu5   | 79.81(7)  |
| 7      | Cu4   | I12   | Cu6   | 132.98(7) |
| 8      | Cu5   | I12   | Cu6   | 132.71(7) |
| 9      | Cu4   | I13   | Cu5   | 82.36(7)  |
| 10     | Cu4   | I13   | Cu6   | 125.62(8) |

| Number | Atom1 | Atom2 | Atom3 | Angle(°)  |
|--------|-------|-------|-------|-----------|
| 11     | Cu5   | I13   | Cu6   | 126.67(8) |
| 12     | I9    | Cu3   | I10   | 128.3(1)  |
| 13     | I9    | Cu3   | I12   | 116.0(1)  |
| 14     | I10   | Cu3   | I12   | 115.3(1)  |
| 15     | I10   | Cu4   | I11   | 114.89(9) |
| 16     | I10   | Cu4   | I12   | 103.64(8) |
| 17     | I10   | Cu4   | I13   | 106.95(8) |
| 18     | I11   | Cu4   | I12   | 114.03(9) |
| 19     | I11   | Cu4   | I13   | 118.67(9) |
| 20     | I12   | Cu4   | I13   | 96.21(7)  |
| 21     | I9    | Cu5   | I12   | 104.95(7) |
| 22     | I9    | Cu5   | I13   | 106.94(7) |
| 23     | I9    | Cu5   | I14   | 110.03(8) |
| 24     | I12   | Cu5   | I13   | 95.66(7)  |
| 25     | I12   | Cu5   | I14   | 117.28(8) |
| 26     | I13   | Cu5   | I14   | 120.20(8) |
| 27     | I13   | Cu5   | Cu3   | 79.6(1)   |
| 28     | I14   | Cu5   | Cu3   | 159.9(1)  |
| 29     | I13   | Cu6   | I15   | 116.7(1)  |
| 30     | I13   | Cu6   | I16   | 115.0(1)  |
| 31     | I13   | Cu6   | I12   | 89.59(7)  |
| 32     | I15   | Cu6   | I16   | 120.2(1)  |
| 33     | I15   | Cu6   | I12   | 98.80(8)  |
| 34     | I16   | Cu6   | I12   | 109.42(9) |
| 35     | I1    | Cu1   | I2    | 103.34(8) |
| 36     | I1    | Cu1   | I3    | 116.96(9) |
| 37     | I1    | Cu1   | I4    | 106.16(8) |
| 38     | I2    | Cu1   | I3    | 108.25(8) |
| 39     | I2    | Cu1   | I4    | 120.08(9) |
| 40     | I3    | Cu1   | I4    | 102.80(8) |
| 41     | I5    | Cu2   | I6    | 108.3(1)  |
| 42     | I5    | Cu2   | I7    | 116.0(1)  |
| 43     | I5    | Cu2   | I8    | 110.6(1)  |
| 44     | I6    | Cu2   | I7    | 113.5(1)  |
| 45     | I6    | Cu2   | I8    | 113.7(1)  |
| 46     | I7    | Cu2   | I8    | 94.4(1)   |
| 47     | I17   | Cu7   | I18   | 104.9(1)  |
| 48     | I17   | Cu7   | I20   | 111.4(1)  |
| 49     | I17   | Cu7   | I19A  | 115.8(1)  |
| 50     | I18   | Cu7   | I20   | 114.8(1)  |
| 51     | I18   | Cu7   | I19A  | 111.4(1)  |
| 52     | I20   | Cu7   | I19A  | 98.8(1)   |

Table S7. Bond length of inorganic module of compound **1**.

| Number | Atom1 | Atom2 | Length(Å) |
|--------|-------|-------|-----------|
| 1      | I9    | Cu3   | 2.500(3)  |
| 2      | I9    | Cu5   | 2.734(3)  |
| 3      | I10   | Cu3   | 2.504(3)  |
| 4      | I10   | Cu4   | 2.760(4)  |
| 5      | I11   | Cu4   | 2.528(2)  |
| 6      | I12   | Cu3   | 2.652(4)  |
| 7      | I12   | Cu4   | 2.782(2)  |
| 8      | I12   | Cu5   | 2.776(2)  |
| 9      | I12   | Cu6   | 3.088(3)  |
| 10     | I13   | Cu4   | 2.692(2)  |
| 11     | I13   | Cu5   | 2.723(2)  |
| 12     | I13   | Cu6   | 2.680(3)  |
| 13     | I14   | Cu5   | 2.536(2)  |
| 14     | I15   | Cu6   | 2.535(3)  |
| 15     | I16   | Cu6   | 2.539(2)  |
| 16     | Cu6   | I12   | 3.088(3)  |
| 17     | I1    | Cu1   | 2.708(3)  |
| 18     | I2    | Cu1   | 2.643(2)  |
| 19     | I3    | Cu1   | 2.637(2)  |
| 20     | I4    | Cu1   | 2.675(3)  |
| 21     | I5    | Cu2   | 2.625(4)  |
| 22     | I6    | Cu2   | 2.622(4)  |
| 23     | I7    | Cu2   | 2.639(3)  |
| 24     | I8    | Cu2   | 2.776(4)  |
| 25     | I17   | Cu7   | 2.676(3)  |
| 26     | I18   | Cu7   | 2.626(3)  |
| 27     | I20   | Cu7   | 2.670(3)  |
| 28     | Cu7   | I19A  | 2.702(5)  |

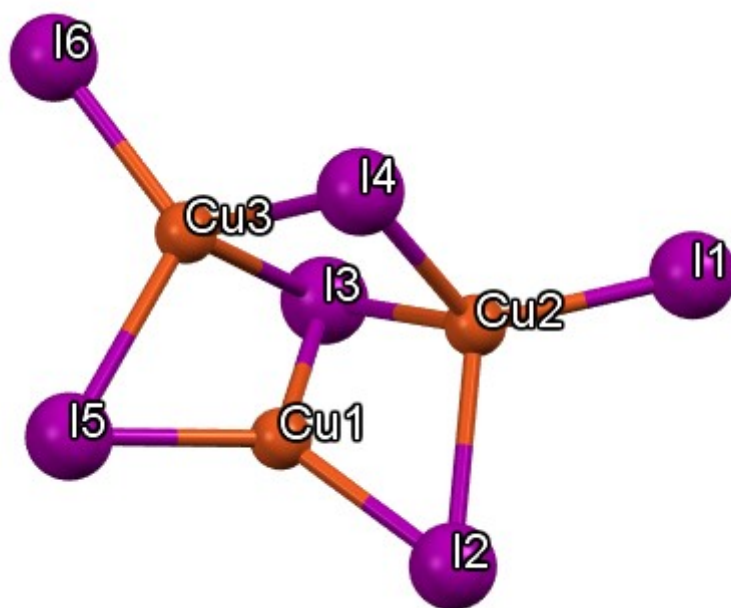

Figure S12. Schematic diagram of inorganic module of compound **2**.

Table S8. Bond angles of inorganic module of compound **2**.

| Number | Atom1 | Atom2 | Atom3 | Angle(°)  |
|--------|-------|-------|-------|-----------|
| 1      | Cu1   | I2    | Cu2   | 56.96(5)  |
| 2      | Cu1   | I3    | Cu2   | 54.82(4)  |
| 3      | Cu1   | I3    | Cu3   | 55.15(5)  |
| 4      | Cu2   | I3    | Cu3   | 74.56(4)  |
| 5      | Cu2   | I4    | Cu3   | 79.75(4)  |
| 6      | Cu1   | I5    | Cu3   | 57.26(7)  |
| 7      | I2    | Cu1   | I3    | 114.09(6) |
| 8      | I2    | Cu1   | I5    | 128.92(9) |
| 9      | I3    | Cu1   | I5    | 116.76(8) |
| 10     | I1    | Cu2   | I12   | 110.09(5) |
| 11     | I1    | Cu2   | I13   | 112.98(5) |
| 12     | I1    | Cu2   | I14   | 118.44(5) |
| 13     | I2    | Cu2   | I13   | 102.06(4) |
| 14     | I2    | Cu2   | I14   | 111.54(5) |
| 15     | I3    | Cu2   | I14   | 100.20(4) |
| 16     | I3    | Cu3   | I14   | 99.33(5)  |
| 17     | I3    | Cu3   | I15   | 105.65(7) |
| 18     | I3    | Cu3   | I16   | 109.92(5) |
| 19     | I4    | Cu3   | I15   | 107.24(7) |
| 20     | I4    | Cu3   | I16   | 117.16(5) |
| 21     | I5    | Cu3   | I16   | 115.75(7) |

Table S9. Bound lengths of inorganic module of compound **2**.

| Number | Atom1 | Atom2 | Length(Å) |
|--------|-------|-------|-----------|
| 1      | I1    | Cu2   | 2.561(1)  |
| 2      | I2    | Cu1   | 2.502(2)  |
| 3      | I2    | Cu2   | 2.776(1)  |
| 4      | I3    | Cu1   | 2.675(2)  |
| 5      | I3    | Cu2   | 2.811(1)  |
| 6      | I3    | Cu3   | 2.820(2)  |
| 7      | I4    | Cu2   | 2.646(1)  |
| 8      | I4    | Cu3   | 2.673(1)  |
| 9      | I5    | Cu1   | 2.543(3)  |
| 10     | I5    | Cu3   | 2.757(3)  |
| 11     | I6    | Cu3   | 2.535(1)  |

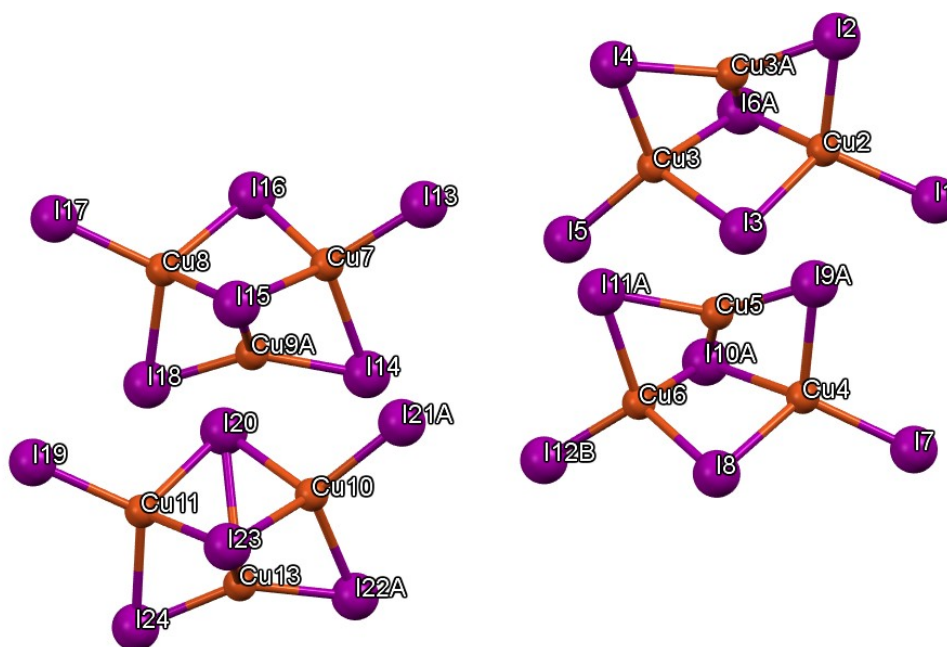Figure S13. Schematic diagram of inorganic module of compound **3**.Table S10. Bound angles of inorganic module of compound **3**.

| Number | Atom1 | Atom2 | Atom3 | Angle(°) |
|--------|-------|-------|-------|----------|
| 1      | Cu2   | I2    | Cu3A  | 56.4(2)  |
| 2      | Cu2   | I3    | Cu3   | 81.8(1)  |
| 3      | Cu3   | I4    | Cu3A  | 58.3(2)  |
| 4      | Cu2   | I6A   | Cu3   | 77.2(6)  |
| 5      | Cu2   | I6A   | Cu3A  | 55.0(5)  |
| 6      | Cu3   | I6A   | Cu3A  | 56.4(5)  |
| 7      | I1    | Cu2   | I2    | 110.2(1) |
| 8      | I1    | Cu2   | I3    | 113.3(1) |
| 9      | I1    | Cu2   | I6A   | 121.2(5) |



| Number | Atom1 | Atom2 | Atom3 | Angle(°) |
|--------|-------|-------|-------|----------|
| 10     | I2    | Cu2   | I3    | 111.6(1) |
| 11     | I2    | Cu2   | I6A   | 100.6(5) |
| 12     | I3    | Cu2   | I6A   | 98.9(5)  |
| 13     | I3    | Cu3   | I4    | 108.4(1) |
| 14     | I3    | Cu3   | I5    | 112.6(1) |
| 15     | I3    | Cu3   | I6A   | 97.3(5)  |
| 16     | I4    | Cu3   | I5    | 116.3(1) |
| 17     | I4    | Cu3   | I6A   | 103.1(5) |
| 18     | I5    | Cu3   | I6A   | 117.0(5) |
| 19     | I2    | Cu3A  | I4    | 130.7(2) |
| 20     | I2    | Cu3A  | I6A   | 114.6(5) |
| 21     | I4    | Cu3A  | I6A   | 114.0(5) |
| 22     | Cu4   | I8    | Cu6   | 78.8(1)  |
| 23     | Cu4   | I9A   | Cu5   | 57.4(2)  |
| 24     | Cu4   | I10A  | Cu5   | 52.8(5)  |
| 25     | Cu4   | I10A  | Cu6   | 78.8(7)  |
| 26     | Cu5   | I10A  | Cu6   | 62.3(6)  |
| 27     | Cu5   | I11A  | Cu6   | 58.0(1)  |
| 28     | I7    | Cu4   | I8    | 115.0(1) |
| 29     | I7    | Cu4   | I9A   | 111.6(2) |
| 30     | I7    | Cu4   | I10A  | 125.5(5) |
| 31     | I7    | Cu4   | Cu5   | 160.8(2) |
| 32     | I8    | Cu4   | I9A   | 109.2(2) |
| 33     | I8    | Cu4   | I10A  | 90.7(5)  |
| 34     | I9A   | Cu4   | I10A  | 102.3(5) |
| 35     | I9A   | Cu5   | I10A  | 128.2(6) |
| 36     | I9A   | Cu5   | I11A  | 129.6(3) |
| 37     | I10A  | Cu5   | I11A  | 101.9(6) |
| 38     | I8    | Cu6   | I10A  | 105.9(6) |
| 39     | I8    | Cu6   | I11A  | 110.5(1) |
| 40     | I8    | Cu6   | I12B  | 116.4(2) |
| 41     | I10A  | Cu6   | I11A  | 101.2(6) |
| 42     | I10A  | Cu6   | I12B  | 110.7(6) |
| 43     | I11A  | Cu6   | I12B  | 110.9(2) |
| 44     | Cu10  | I20   | Cu11  | 83.8(1)  |
| 45     | Cu10  | I20   | Cu13  | 47.5(1)  |
| 46     | Cu11  | I20   | Cu13  | 49.9(1)  |
| 47     | Cu10  | I22A  | Cu13  | 56.0(2)  |
| 48     | Cu10  | I23   | Cu11  | 76.9(2)  |
| 49     | Cu10  | I23   | Cu13  | 53.1(2)  |
| 50     | Cu11  | I23   | Cu13  | 54.7(2)  |
| 51     | Cu11  | I24   | Cu13  | 58.3(2)  |
| 52     | I20   | Cu10  | I21A  | 113.6(2) |

| Number | Atom1 | Atom2 | Atom3 | Angle(°) |
|--------|-------|-------|-------|----------|
| 53     | I20   | Cu10  | I22A  | 109.4(2) |
| 54     | I20   | Cu10  | I23   | 97.5(2)  |
| 55     | I21A  | Cu10  | I22A  | 113.5(2) |
| 56     | I21A  | Cu10  | I23   | 115.7(2) |
| 57     | I22A  | Cu10  | I23   | 105.8(2) |
| 58     | I19   | Cu11  | I20   | 114.6(2) |
| 59     | I19   | Cu11  | I23   | 119.5(2) |
| 60     | I19   | Cu11  | I24   | 114.4(2) |
| 61     | I20   | Cu11  | I23   | 95.4(2)  |
| 62     | I20   | Cu11  | I24   | 111.0(2) |
| 63     | I23   | Cu11  | I24   | 99.6(2)  |
| 64     | I20   | Cu13  | I22A  | 96.5(2)  |
| 65     | I20   | Cu13  | I23   | 86.5(2)  |
| 66     | I20   | Cu13  | I24   | 99.5(2)  |
| 67     | I22A  | Cu13  | I23   | 114.9(2) |
| 68     | I22A  | Cu13  | I24   | 131.1(3) |
| 69     | I23   | Cu13  | I24   | 112.0(2) |
| 70     | Cu7   | I14   | Cu9A  | 57.1(1)  |
| 71     | Cu7   | I15   | Cu8   | 76.9(1)  |
| 72     | Cu7   | I15   | Cu9A  | 55.1(1)  |
| 73     | Cu8   | I15   | Cu9A  | 54.7(1)  |
| 74     | Cu7   | I16   | Cu8   | 79.9(1)  |
| 75     | Cu8   | I18   | Cu9A  | 57.7(1)  |
| 76     | I13   | Cu7   | I14   | 110.1(1) |
| 77     | I13   | Cu7   | I15   | 116.7(1) |
| 78     | I13   | Cu7   | I16   | 115.1(1) |
| 79     | I14   | Cu7   | I15   | 105.7(1) |
| 80     | I14   | Cu7   | I16   | 108.7(1) |
| 81     | I15   | Cu7   | I16   | 99.7(1)  |
| 82     | I15   | Cu8   | I16   | 96.7(1)  |
| 83     | I15   | Cu8   | I17   | 115.9(1) |
| 84     | I15   | Cu8   | I18   | 103.6(1) |
| 85     | I16   | Cu8   | I17   | 117.3(1) |
| 86     | I16   | Cu8   | I18   | 111.2(1) |
| 87     | I17   | Cu8   | I18   | 110.7(1) |
| 88     | I14   | Cu9A  | I15   | 113.1(2) |
| 89     | I14   | Cu9A  | I18   | 132.7(2) |
| 90     | I15   | Cu9A  | I18   | 113.4(2) |

Table S11. Bond lengths of inorganic module of compound **3**.

| Number | Atom1 | Atom2 | Length(Å) |
|--------|-------|-------|-----------|
| 1      | I1    | Cu2   | 2.594(4)  |
| 2      | I2    | Cu2   | 2.731(4)  |

| Number | Atom1 | Atom2 | Length(Å) |
|--------|-------|-------|-----------|
| 3      | I2    | Cu3A  | 2.531(6)  |
| 4      | I3    | Cu2   | 2.684(4)  |
| 5      | I3    | Cu3   | 2.724(3)  |
| 6      | I4    | Cu3   | 2.665(3)  |
| 7      | I4    | Cu3A  | 2.609(6)  |
| 8      | I5    | Cu3   | 2.522(4)  |
| 9      | I6A   | Cu2   | 2.82(2)   |
| 10     | I6A   | Cu3   | 2.85(2)   |
| 11     | I6A   | Cu3A  | 2.55(3)   |
| 12     | I7    | Cu4   | 2.588(4)  |
| 13     | I8    | Cu4   | 2.687(4)  |
| 14     | I8    | Cu6   | 2.720(4)  |
| 15     | I9A   | Cu4   | 2.755(9)  |
| 16     | I9A   | Cu5   | 2.425(9)  |
| 17     | I10A  | Cu4   | 3.00(2)   |
| 18     | I10A  | Cu5   | 2.56(2)   |
| 19     | I10A  | Cu6   | 2.35(3)   |
| 20     | I11A  | Cu5   | 2.507(4)  |
| 21     | I11A  | Cu6   | 2.733(4)  |
| 22     | I12B  | Cu6   | 2.505(4)  |
| 23     | I19   | Cu11  | 2.531(4)  |
| 24     | I20   | Cu10  | 2.662(5)  |
| 25     | I20   | Cu11  | 2.666(5)  |
| 26     | I20   | Cu13  | 3.293(5)  |
| 27     | I21A  | Cu10  | 2.559(5)  |
| 28     | I22A  | Cu10  | 2.704(5)  |
| 29     | I22A  | Cu13  | 2.535(5)  |
| 30     | I23   | Cu10  | 2.820(7)  |
| 31     | I23   | Cu11  | 2.902(6)  |
| 32     | I23   | Cu13  | 2.690(7)  |
| 33     | I24   | Cu11  | 2.752(7)  |
| 34     | I24   | Cu13  | 2.521(7)  |
| 35     | I13   | Cu7   | 2.553(4)  |
| 36     | I14   | Cu7   | 2.755(3)  |
| 37     | I14   | Cu9A  | 2.490(5)  |
| 38     | I15   | Cu7   | 2.712(4)  |
| 39     | I15   | Cu8   | 2.835(4)  |
| 40     | I15   | Cu9A  | 2.731(5)  |
| 41     | I16   | Cu7   | 2.689(3)  |
| 42     | I16   | Cu8   | 2.687(4)  |
| 43     | I17   | Cu8   | 2.527(4)  |
| 44     | I18   | Cu8   | 2.756(4)  |
| 45     | I18   | Cu9A  | 2.525(5)  |

## References

1. H. Li, Y. Lv, Z. Zhou, H. Tong, W. Liu and G. Ouyang, Coordinated Anionic Inorganic Module—An Efficient Approach Towards Highly Efficient Blue-Emitting Copper Halide Ionic Hybrid Structures, *Angew. Chem. Int. Ed.*, 2021, **61**, e202115225.
2. W. Liu, Y. Fang, G. Z. Wei, S. J. Teat, K. Xiong, Z. Hu, W. P. Lustig and J. Li, A Family of Highly Efficient CuI-Based Lighting Phosphors Prepared by a Systematic, Bottom-up Synthetic Approach, *J. Am. Chem. Soc.*, 2015, **137**, 9400-9408.
3. W. Liu, D. Banerjee, F. Lin and J. Li, Strongly luminescent inorganic–organic hybrid semiconductors with tunable white light emissions by doping, *J. Mater. Chem. C*, 2019, **7**, 1484-1490.
4. J. Fan, H. Tong, Q. Wang, J. Zhu, H. Li, W. Liu and G. Ouyang, Blue-Excitable–Green-Emitting Organic Manganese Halides for White Light-Emitting Diodes, *Cryst. Growth Des.*, 2024, **24**, 6572-6577.
5. J. Zhu, C. Su, J. Yang, H. Tong, H. Li, W. Liu and G. Ouyang, Highly Emissive Organic Antimony Halide with Ferromagnetism and Methanol Sensing Properties, *Cryst. Growth Des.*, 2024, **24**, 4293-4299.
6. H. Li, Y. Lv, Y. Tan, J. Yang, W. Liu and G. Ouyang, Ultrastable Copper Iodide Hybrid with Intrinsic Greenish White-Light Emission by Incorporating an Anionic Inorganic Functional Unit into an Extended Structure, *Inorg. Chem.*, 2024, DOI: 10.1021/acs.inorgchem.4c01231.
7. Q. Kong, X. Jiang, Y. Sun, J. Zhu and X. Tao, Yellow-emissive organic copper(i) halide single crystals with [Cu<sub>4</sub>I<sub>4</sub>] cubane unit as efficient X-ray scintillators, *Inorg. Chem. Front.*, 2024, **11**, 3028-3035.
8. R.-W. Huang, X. Song, S. Chen, J. Yin, P. Maity, J. Wang, B. Shao, H. Zhu, C. Dong, P. Yuan, T. Ahmad, O. F. Mohammed and O. M. Bakr, Radioluminescent Cu–Au Metal Nanoclusters: Synthesis and Self-Assembly for Efficient X-ray Scintillation and Imaging, *J. Am. Chem. Soc.*, 2023, **145**, 13816-13827.
9. T. Xu, Y. Li, M. Nikl, R. Kucerkova, Z. Zhou, J. Chen, Y.-Y. Sun, G. Niu, J. Tang, Q. Wang, G. Ren and Y. Wu, Lead-Free Zero-Dimensional Organic-Copper(I) Halides as Stable and Sensitive X-ray Scintillators, *ACS Appl. Mater. Interfaces*, 2022, **14**, 14157-14164.
10. K. Kirakci, K. Fejfarová, J. Martinčík, M. Nikl and K. Lang, Tetranuclear Copper(I) Iodide Complexes: A New Class of X-ray Phosphors, *Inorg. Chem.*, 2017, **56**, 4609-4614.
11. X. Liu, Y. Jiang, F. Li, X. Xu, R. Li, W. Zhu, J. Ni, C. Ding, S. Liu and Q. Zhao, Thermally Activated Delayed Fluorescent Scintillators Based on Mononuclear Copper(I) Halide Complexes for High-Resolution X-Ray Imaging, *Adv. Opt. Mater.*, 2022, **11**, 2202169.
